# Supplementary material for: Binding of the vesicle docking protein p115 to the GTPase Rab1b regulates membrane recruitment of the COPI vesicle coat
Source: PubMed Central journal article supplement — Cell Logist. 2014 Jan 9;3:e27687. doi: 10.4161/cl.27687 (PMC4187009; doi:10.4161/cl.27687), 2014-01-09

## **Supplemental Material to:**

**Yusong Guo and Adam D Linstedt**

**Binding of the vesicle docking protein p115 to the GTPase  
Rab1b regulates membrane recruitment of the COPI  
vesicle coat**

**Cellular Logistics 2013; 3(1)**

**<http://dx.doi.org/10.4161/cl.27687>**

**[www.landesbioscience.com/journals/cellularlogistics/article/27687](http://www.landesbioscience.com/journals/cellularlogistics/article/27687)**

## Supplementary Figure Legends

### **Fig. S1. Co-immunoprecipitation of p115 with Rab1b.**

HeLa cells were untransfected or transfected with HA-tagged Rab1b and immunoprecipitation was carried out using mouse anti-HA antibodies. Recovery of p115 was determined by immunoblot using rabbit anti-p115 antibody and compared to a 1% loading controls.

### **Fig. S2. Binding of p115 cc2 domain to Rab1b but not Rab27b.**

Glutathione beads bearing similar amount of GST or GST-p115-cc2 were incubated with cell lysates from HeLa cells transfected with HA-Rab1b and GFP-Rab27b. Recovery of HA-Rab1b or GFP-Rab27b was determined by immunoblotting with mouse anti-HA antibody or mouse anti-GFP antibody.

### **Figure S3. Rescue of Golgi morphology and Rab1b membrane association with wildtype p115.**

Cells were mock transfected (**A-D**) or transfected with p115 siRNA (**E-H**) and re-transfected after 48 h with plasmid encoding Myc-tagged bovine p115. After an additional 24 h, the cells were stained using rabbit anti-Rab1b antibody and anti-Myc p115 antibody. Bar=10 $\mu$ m.

**FigS1**

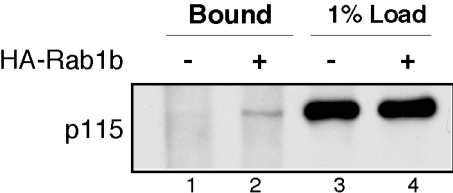

**FigS2**

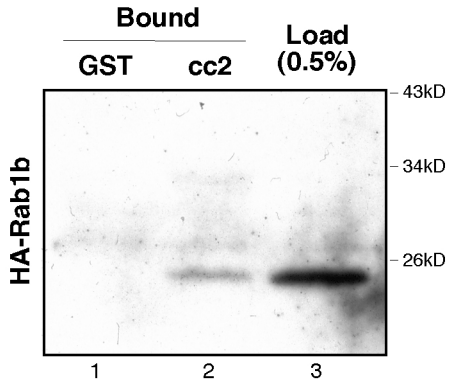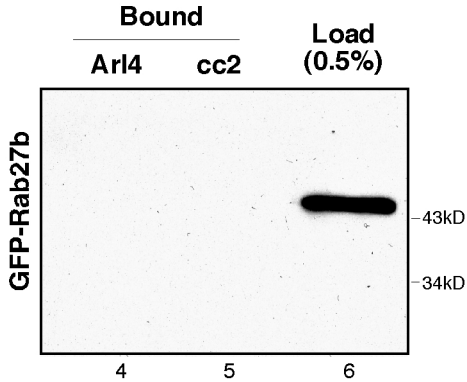

Fig. S3

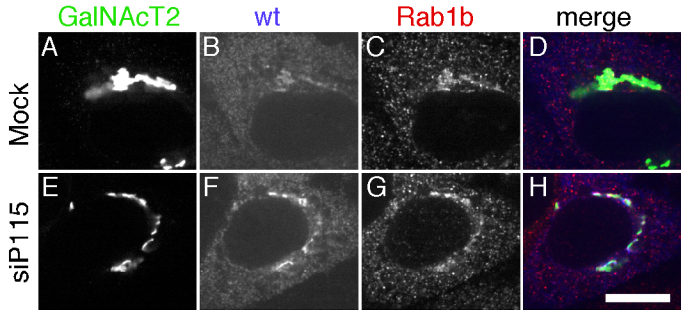

Supplement: cl-3-e27687-s01.pdf [file cl-3-e27687-s01.pdf]
